# Supplementary material for: Mechanistic Insights into the Selective Synthesis of 4H-Pyran Derivatives On-Water Using Naturally Occurring Alginate from Sargassum muticum: Experimental and DFT Study
Source: MDPI journal article supplement (doi:10.3390/gels8110713), 2022-11-04
Supplement: s1 [file s1]

## Article

# Mechanistic Insights into the Selective Synthesis of 4*H*-Pyran Derivatives On-Water Using Naturally Occurring Alginate from *Sargassum muticum*: Experimental and DFT Study

Khaoula Oudghiri <sup>1</sup>, Zahira Belattmania <sup>2,\*</sup>, Hamid Elmouli <sup>3</sup>, Salaheddine Guesmi <sup>3</sup>, Fouad Bentiss <sup>4,5</sup>,  
Brahim Sabour <sup>2</sup>, Lahoucine Bahsis <sup>3,6,\*</sup> and Moha Taourirte <sup>1</sup>

<sup>1</sup> Laboratoire de Recherche en Développement Durable et Santé, Faculté des Sciences et Techniques de Marrakech, Université Cadi Ayyad, Marrakech 40000, Morocco

<sup>2</sup> Laboratory of Plant Biotechnology, Ecology and Ecosystem Valorization—URL CNRST N=10, Faculty of Sciences El Jadida, University Chouaib Doukkali, P.O. Box 20, El Jadida 24000, Morocco

<sup>3</sup> Laboratoire de Chimie de Coordination et d'Analytique (LCCA), Département de Chimie, Faculté des Sciences, Université Chouaib Doukkali, P.O. Box 20; El Jadida 24000, Morocco

<sup>4</sup> Laboratory of Catalysis and Corrosion of Materials, Faculty of Sciences, University Chouaib Doukkali, P.O. Box 20, El Jadida 24000, Morocco

<sup>5</sup> Materials and Transformations Unit, University of Lille, CNRS, INRAE, Centrale Lille, UMR 8207-UMET, F-59000 Lille, France

<sup>6</sup> Laboratoire de Chimie Analytique et Moléculaire, LCAM, Faculté Polydisciplinaire de Safi, Université Cadi Ayyad, Safi 46030, Morocco

\* Correspondence: belattmania.z@ucd.ac.ma (Z.B.); bahsis.lahoucine@gmail.com (L. B.)

## Supplementary Materials

## 1. SEM/EDX analyses of fresh and recovered SA

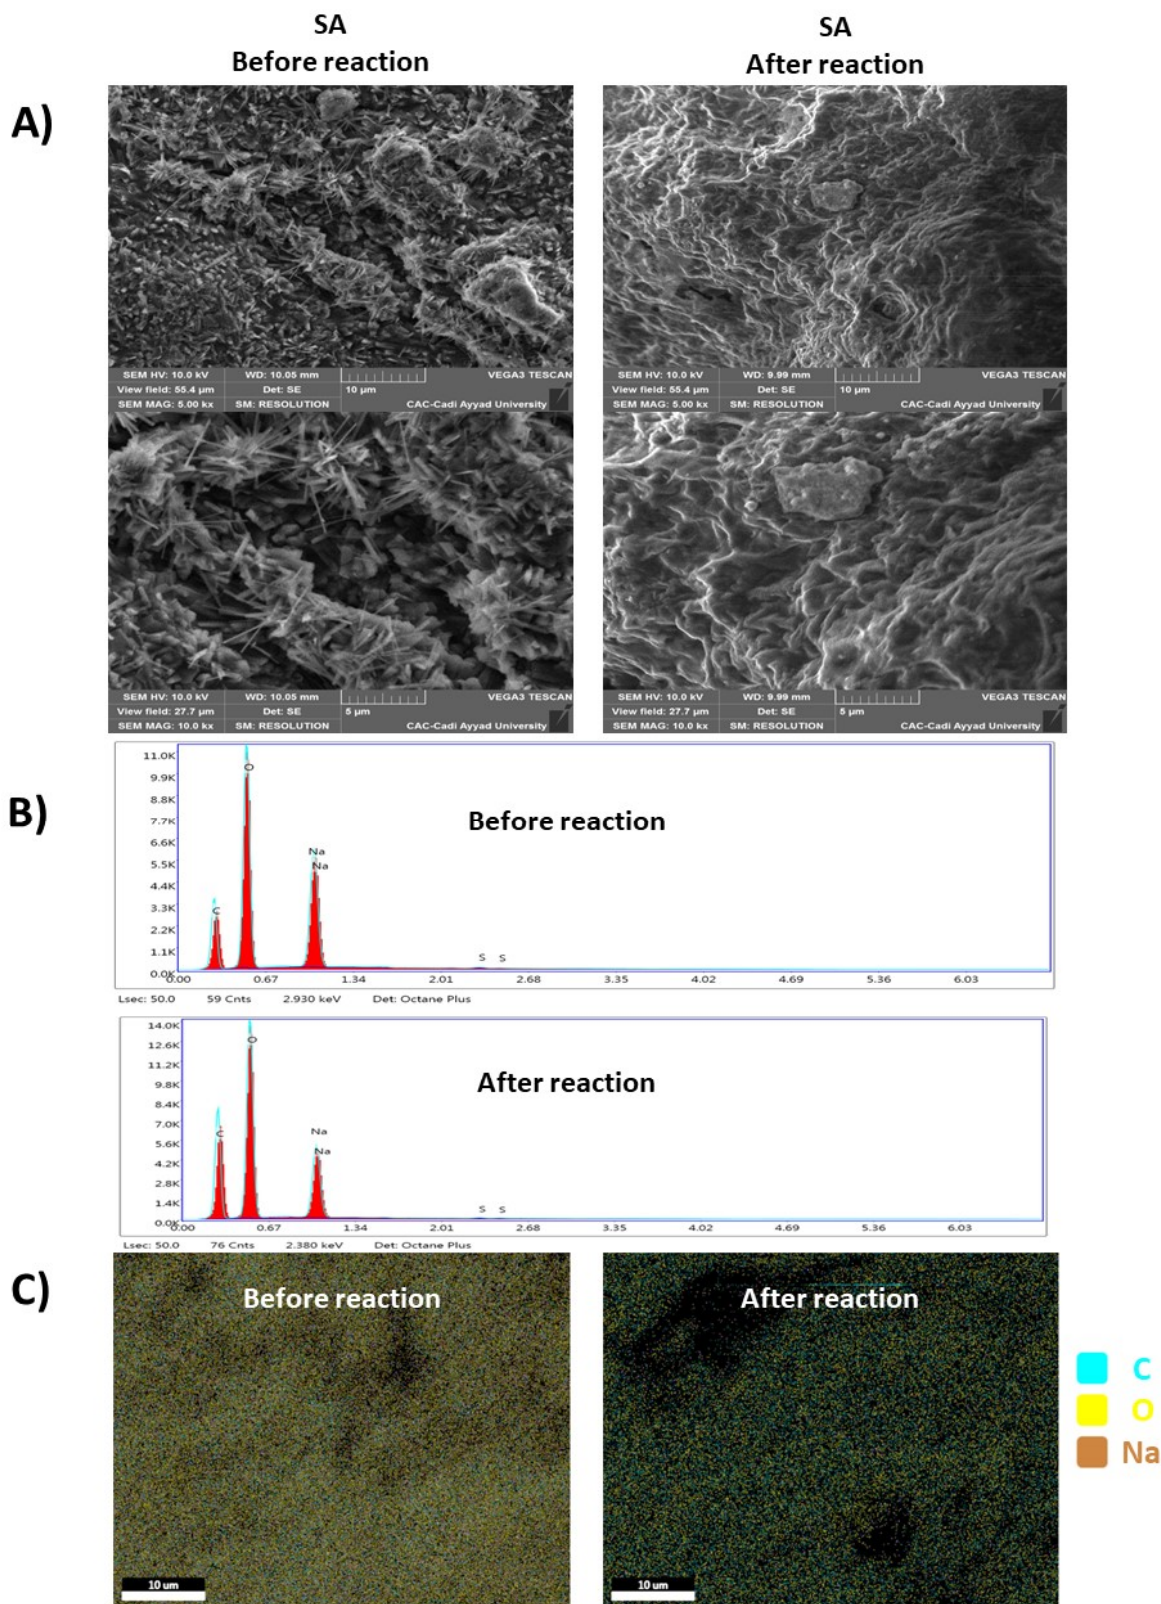

**Figure S1.** (A) SEM micrographs, (B) EDX and (C) EDX mapping analyses of fresh and recovered natural-occurring SA surface.

## 2. NMR analysis of prepared compound

### 2.1. Methyl 6-amino-5-cyano-2-methyl-4-phenyl-4H-pyran-3-carboxylate (4a)

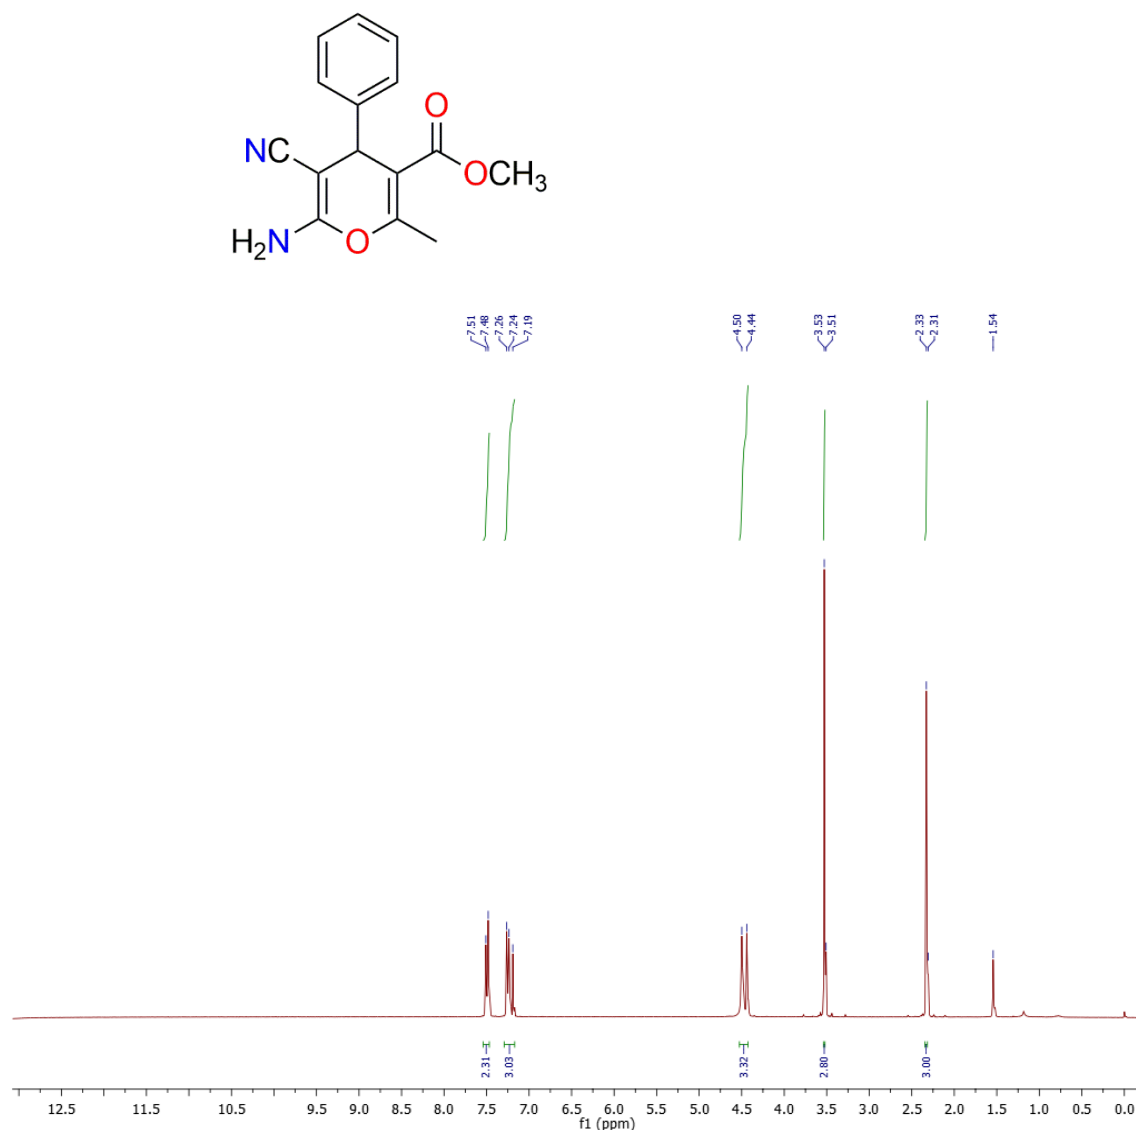

**Figure S2.** <sup>1</sup>H NMR Spectrum of compound 4a.

Yield: 93.7 %, white crystals, mp 172–174 °C, <sup>1</sup>H NMR (300 MHz, CDCl<sub>3</sub>) δ 7.49 (d, J = 8.1 Hz, 5H), 7.25 (d, J = 8.1 Hz, 5H), 4.50 (s, 2H), 4.44 (s, 1H), 3.52 (d, J = 6.4 Hz, 3H), 2.33 (s, 3H).

## 2.2. Methyl 6-amino-4-(2-bromophenyl)-5-cyano-2-methyl-4H-pyran-3-carboxylate (4b)

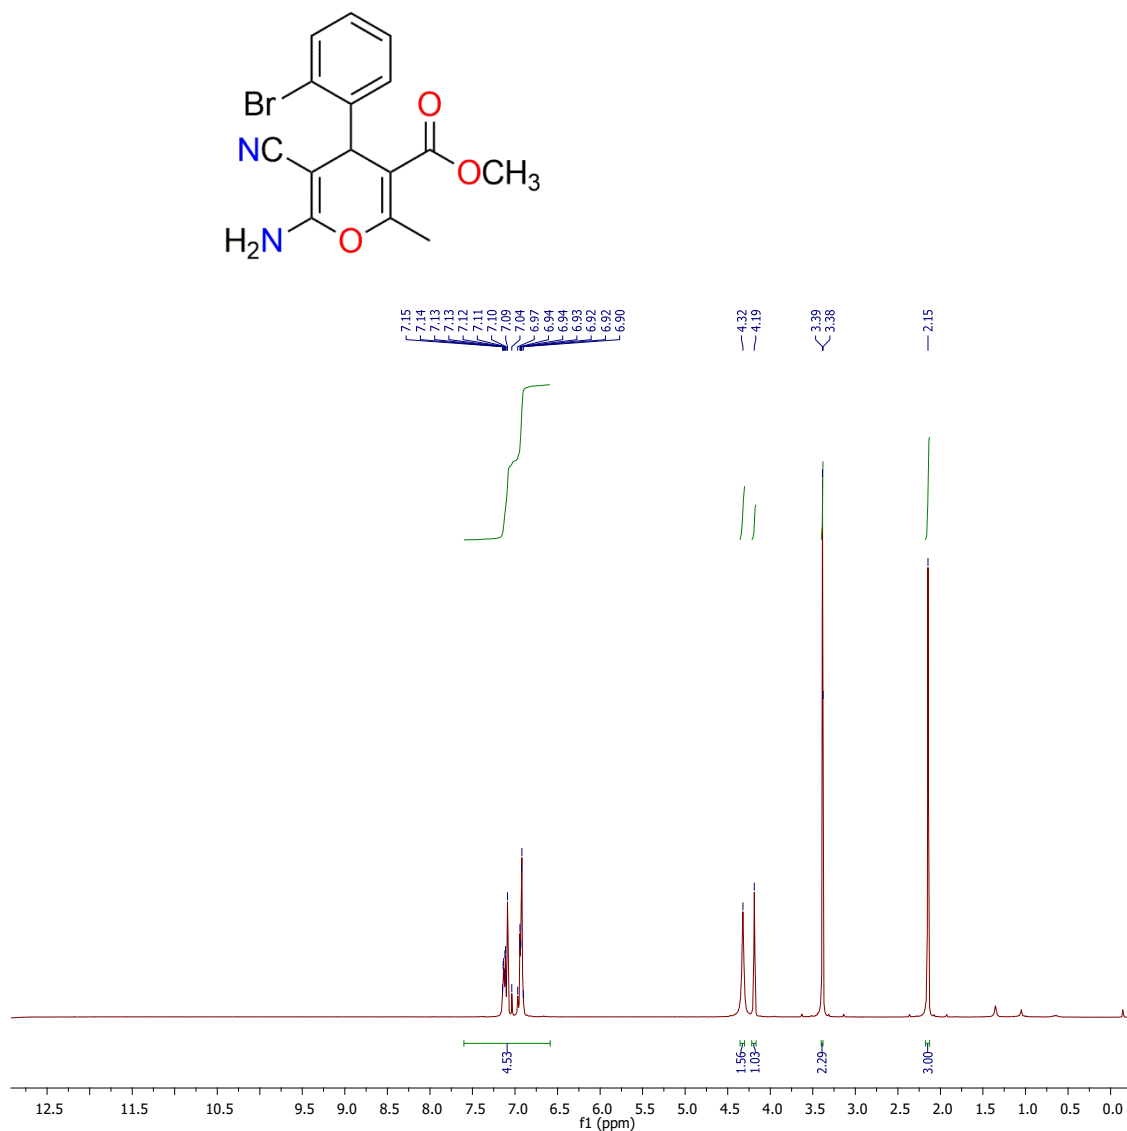Figure S3. <sup>1</sup>H NMR Spectrum of compound 4b.

Yield: 50,2%, white crystals, mp 172–174 °C, <sup>1</sup>H NMR (300 MHz, CDCl<sub>3</sub>) δ 7.60 – 6.59 (m, 1H), 4.32 (s, 2H), 4.19 (s, 1H), 3.39 (s, 3H), 2.15 (s, 3H).

## 2.3. Methyl 6-amino-5-cyano-4-(3-fluorophenyl)-2-methyl-4H-pyran-3-carboxylate (4c)

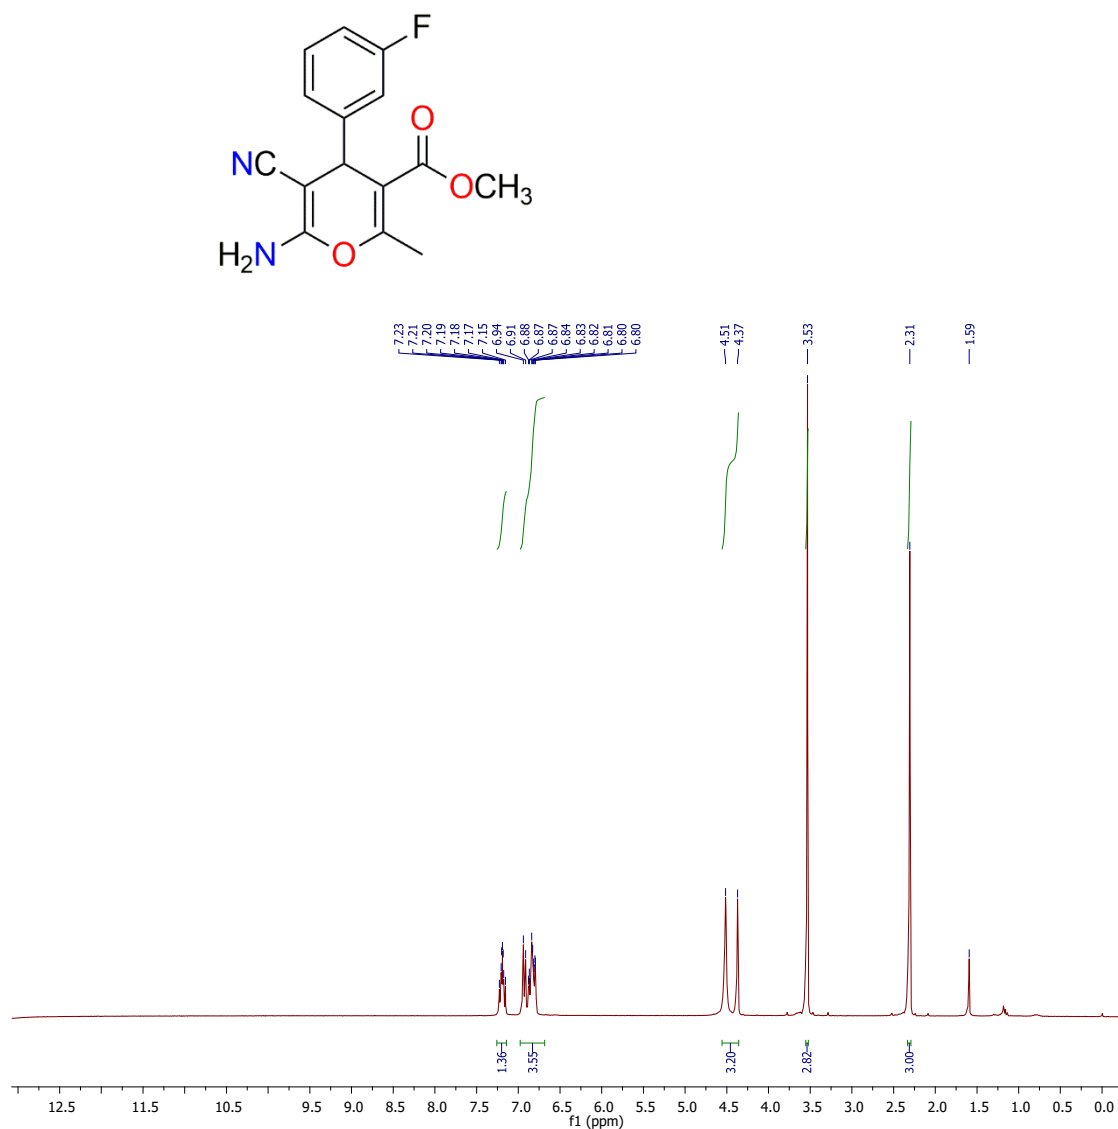

**Figure S4.** <sup>1</sup>H NMR Spectrum of compound 4c.

Yield: 77,3%, white crystals, mp 170–172 °C, <sup>1</sup>H NMR (300 MHz, CDCl<sub>3</sub>) δ 7.26 – 7.14 (m, 1H), 6.98 – 6.68 (m, 2H), 4.44 (s, J = 43.2 Hz, 2H), 3.53 (s, 3H), 2.31 (s, 3H).

## 2.4. Methyl 6-amino-5-cyano-2-methyl-4-(4-nitrophenyl)-4H-pyran-3-carboxylate (4d)

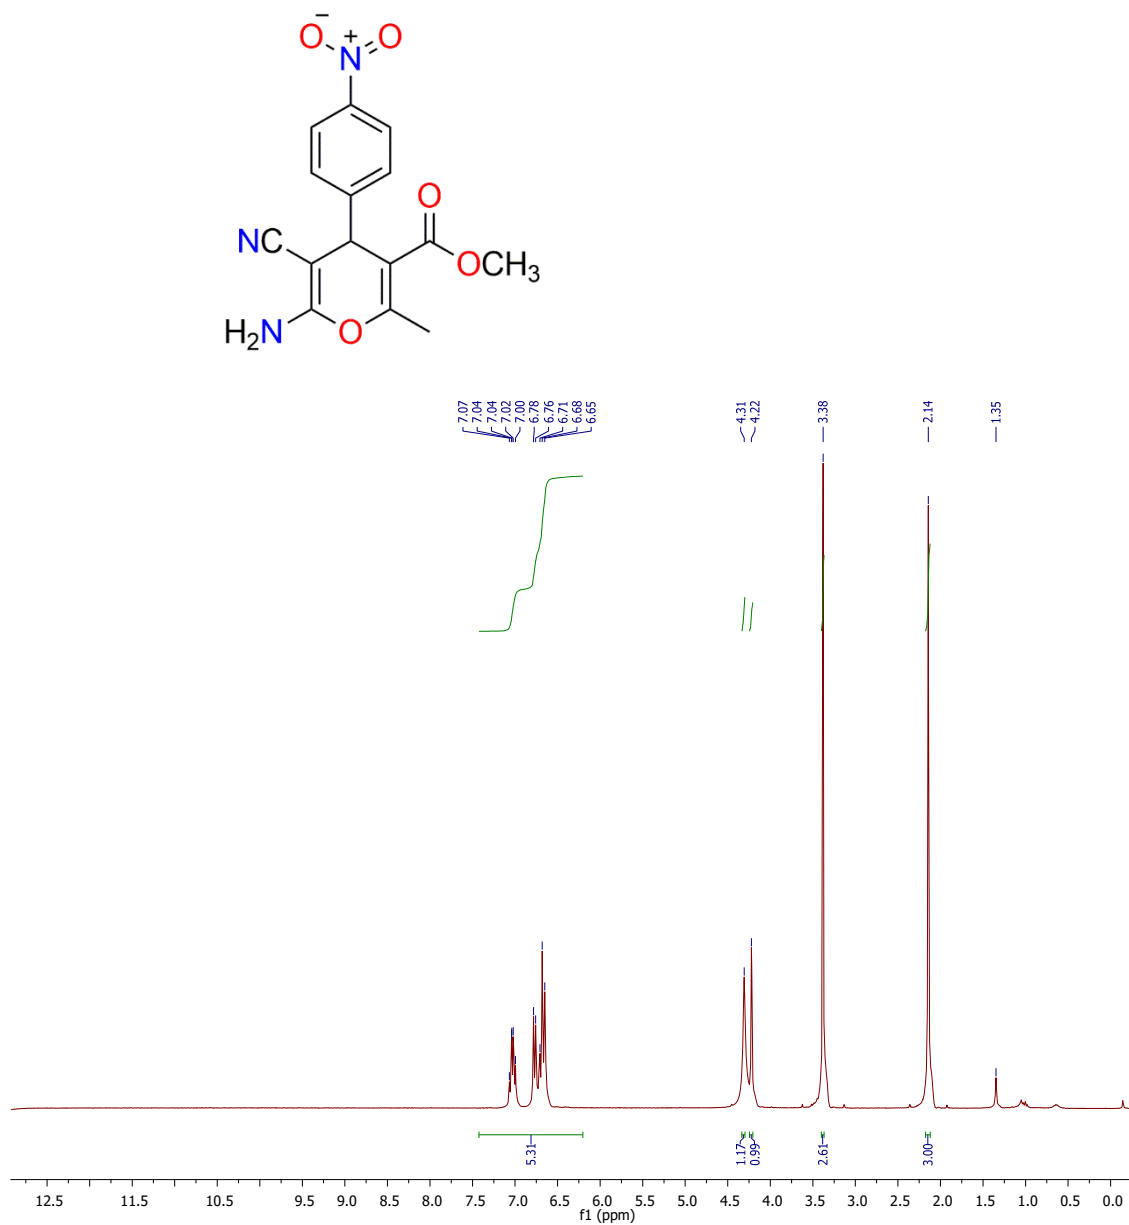**Figure S5.** <sup>1</sup>H NMR Spectrum of compound 4d.

Yield: 52,1%, white solid, mp 180-181 °C, <sup>1</sup>H NMR (300 MHz, CDCl<sub>3</sub>) δ 7.42 – 6.20 (m, 1H), 4.31 (s, 2H), 4.22 (s, 1H), 3.38 (s, 3H), 2.14 (s, 3H).

2.5. Methyl 6-amino-5-cyano-2-methyl-4-(4-(trifluoromethyl)phenyl)-4H-pyran-3-carboxylate (4e)

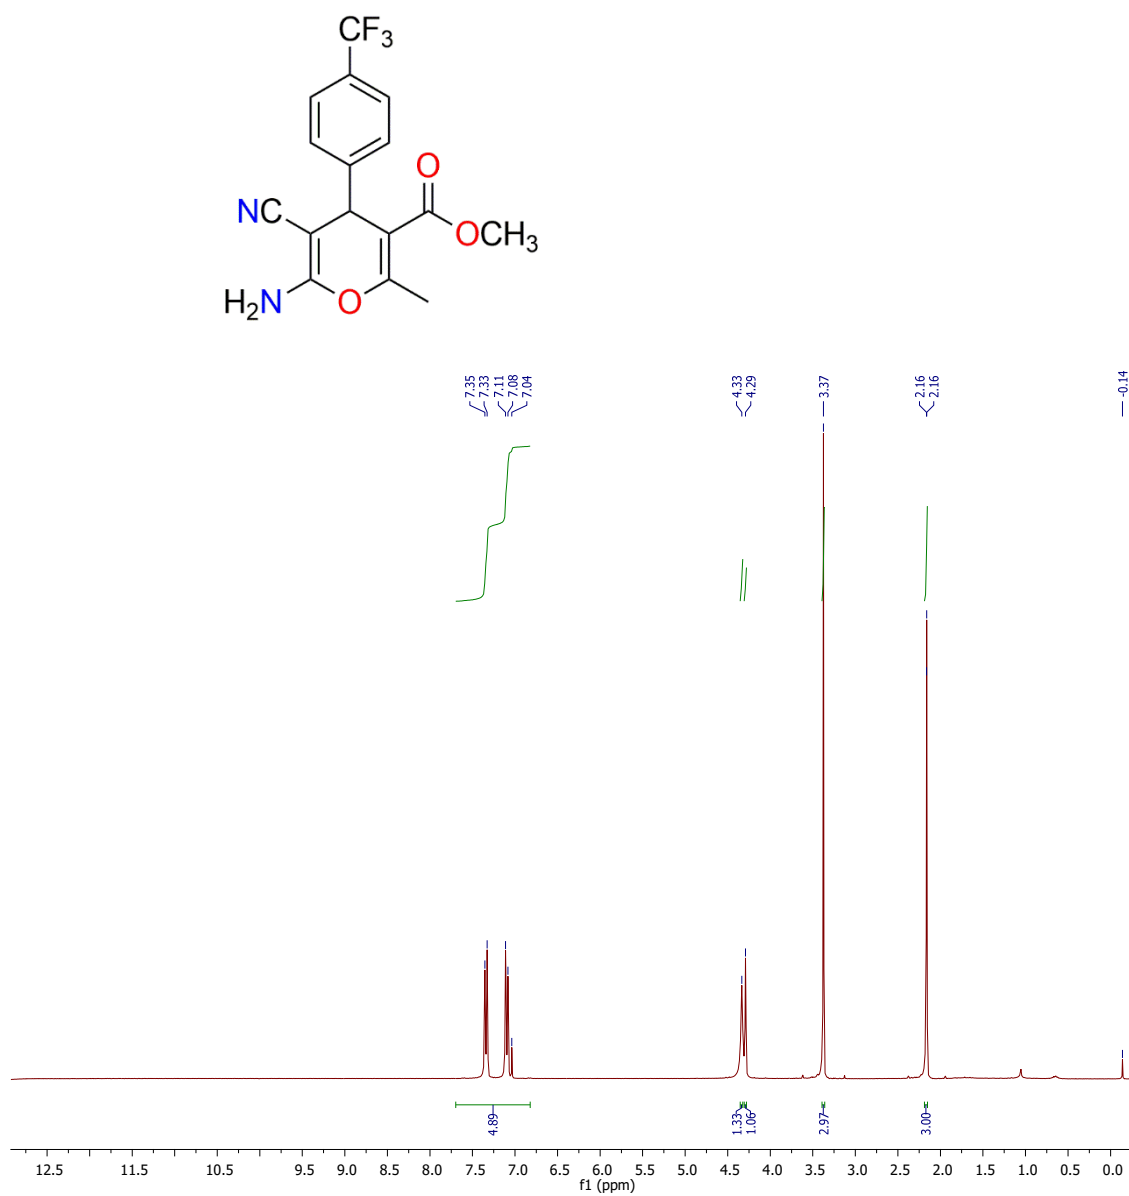

**Figure S6.** <sup>1</sup>H NMR Spectrum of compound 4e.

Yield: 82,3%, white solid, mp 173-175 °C, <sup>1</sup>H NMR (300 MHz, CDCl<sub>3</sub>) δ 7.34 (d, J = 8.2 Hz, 1H), 7.10 (d, J = 8.1 Hz, 1H), 7.04 (s, 1H), 4.33 (s, 2), 4.29 (s, 1H), 3.37 (s, 3H), 2.16 (s, J = 0.8 Hz, 3H).

## 2.6. Methyl 6-amino-5-cyano-2-methyl-4-(4-(methylphenyl)-4H-pyran-3-carboxylate (4g)

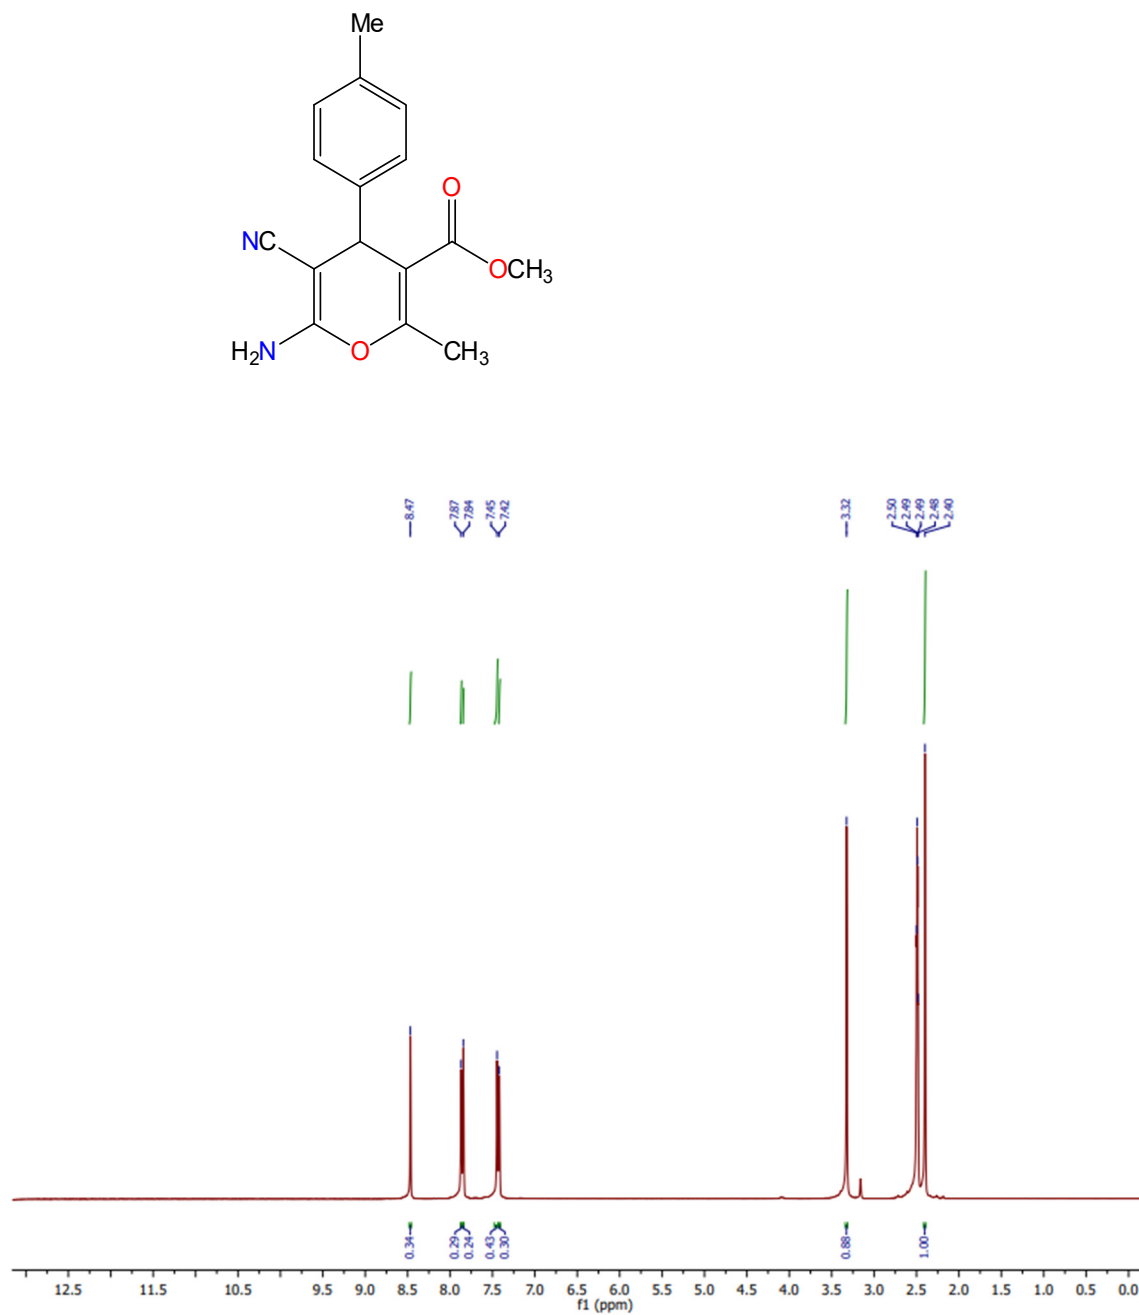Figure S7. <sup>1</sup>H NMR Spectrum of compound 4g.

Yield: 82%, white crystals, mp 143–146°C, <sup>1</sup>H NMR (300 MHz, DMSO) δ 7.42–7.80 (m, J = 8.2 Hz, 1H), 3.32 (s, 3H), 2.40 (s, J = 0.8 Hz, 3H), 8.47 (s, 3H).



## 2.7. Methyl 6-amino-5-cyano-2-methyl-4-(4-(chlorophenyl)-4H-pyran-3-carboxylate (4f)

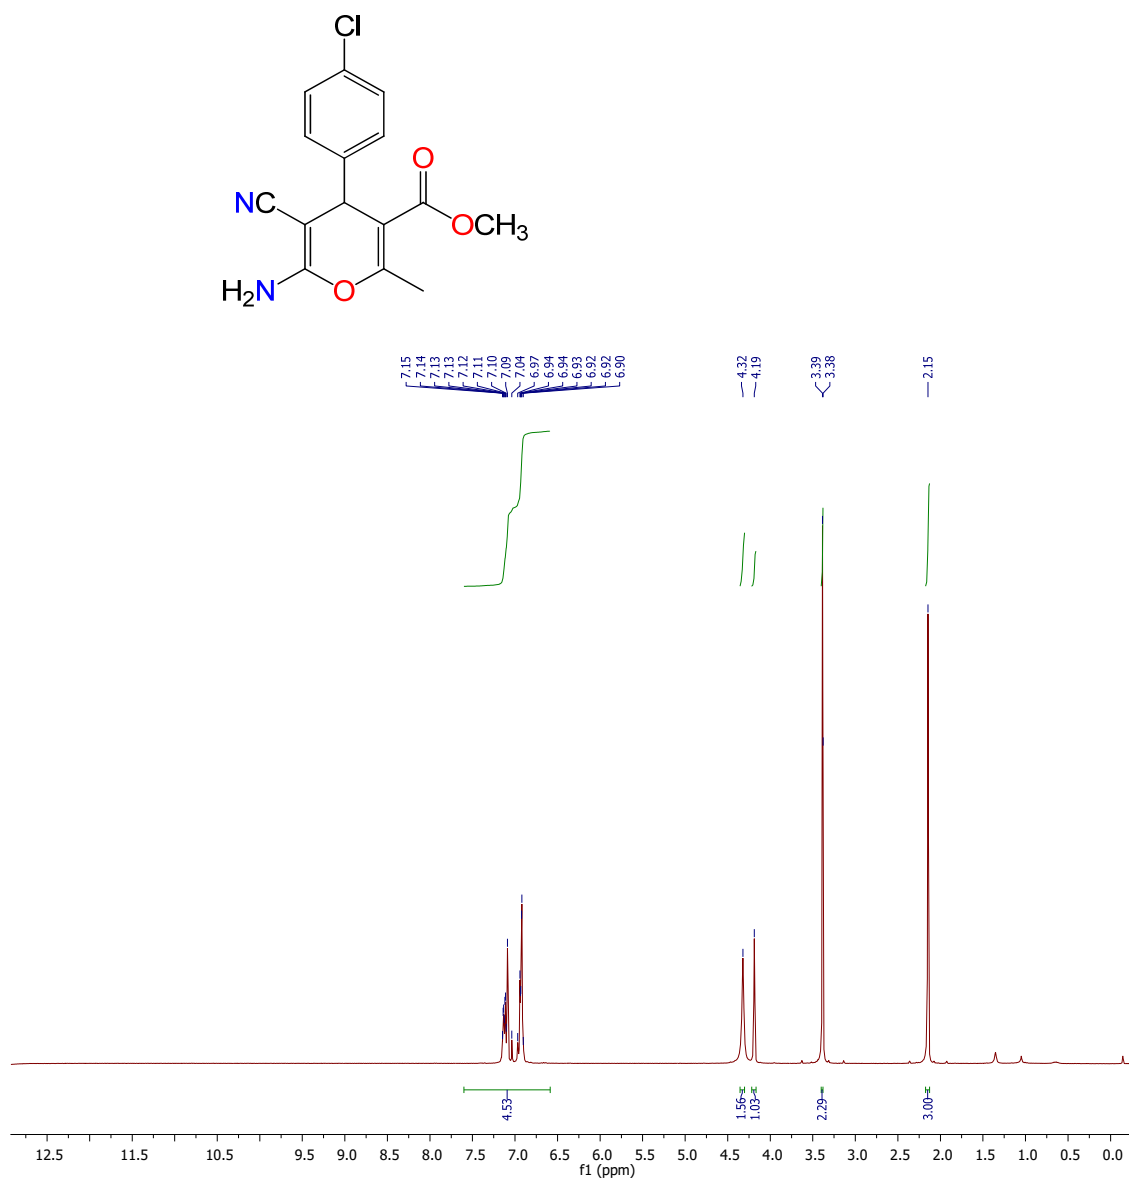**Figure S8.** <sup>1</sup>H NMR Spectrum of compound 4f.

Yield: 82%, white solid, mp 160-163°C, <sup>1</sup>H NMR (300 MHz, DMSO) δ 7.34 (d, J = 8.2 Hz, 1H), 7.20 (d, J = 8.1 Hz, 1H), 7.07 (s, 1H), 4.46 (s, 2H), 4.37 (s, 1H), 3.53 (s, 3H), 2.30 (s, J = 0.8 Hz, 3H).

2.8. Methyl 6-amino-5-cyano-2-methyl-4-(4-(dimethylaminophenyl)-4H-pyran-3-carboxylate (4h)

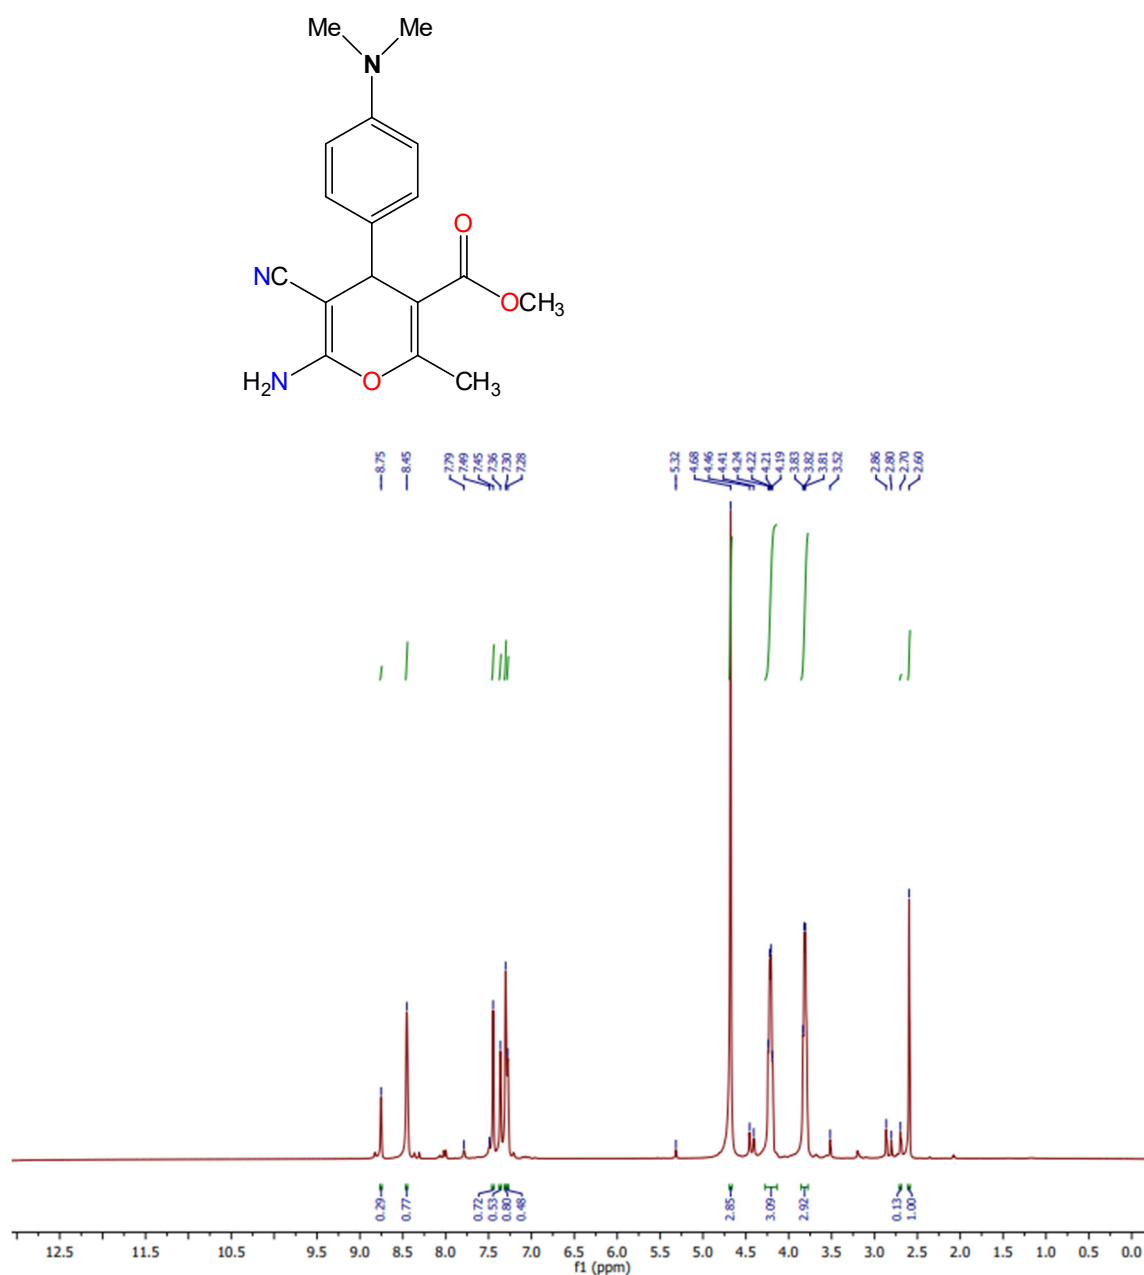

Figure S9. <sup>1</sup>H NMR Spectrum of compound 4h.

Yield: 95%, white solid, mp 195–197°C, <sup>1</sup>H NMR (300 MHz, DMSO) δ 8.75 (s, 1H), 8.45 (s, 1H), 7.28–7.49 (m, J = 8.2 Hz, 1H), 4.68 (s, 2H), 4.19 (s, 1H), 3.81 (s, 3H), 2.58 (s, J = 0.8 Hz, 3H).

### 3. FTIR spectrum of benzaldehyde

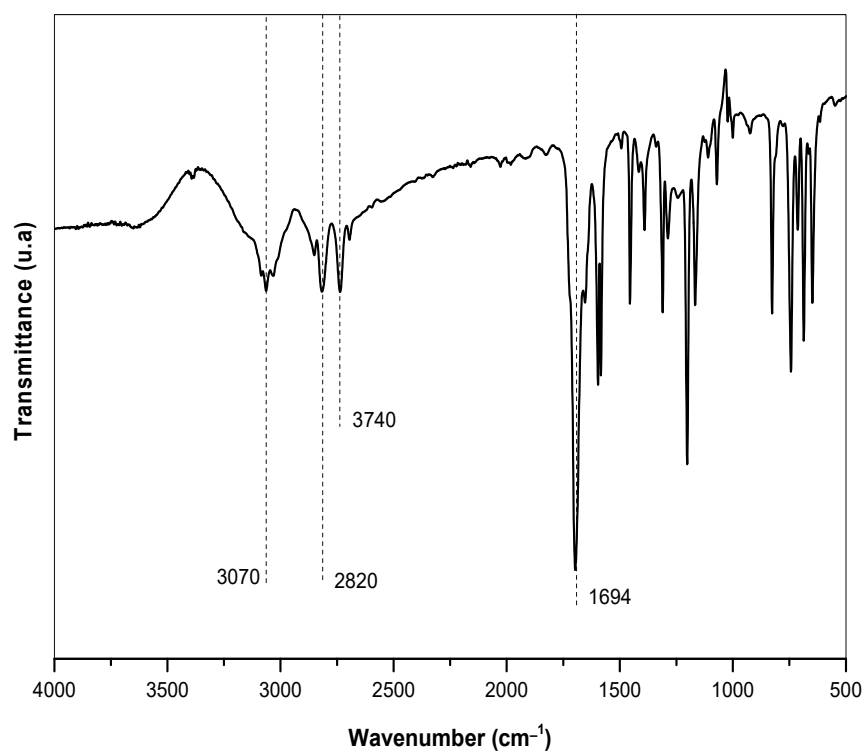

Figure S10. FTIR spectrum of benzaldehyde.

#### 4. NCI analysis of RC intermediate

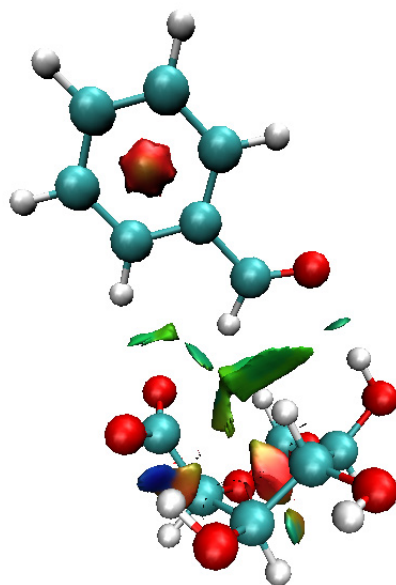

**Figure S11.** NCI analysis of RC intermediate ( $s = 0.34$ ). For color codes: green (carbon atoms), red (oxygen atoms), blue (nitrogen atoms) and white (hydrogen atoms).

#### 5. Effect of the amount of SA on the pH of the aqueous solution

**Table S1.** Effect of the amount of SA on the pH of aqueous solution<sup>a</sup>.

| Amount of SA (mg) | pH    |
|-------------------|-------|
| 5                 | 8.07  |
| 20                | 9.83  |
| 40                | 10.02 |
| 80                | 10.30 |
| 100               | 10.34 |

<sup>a</sup>Reaction condition: water (5 mL) at room temperature.

## 6. DFT calculation of non-catalytic reaction for selective synthesis of the product 4a

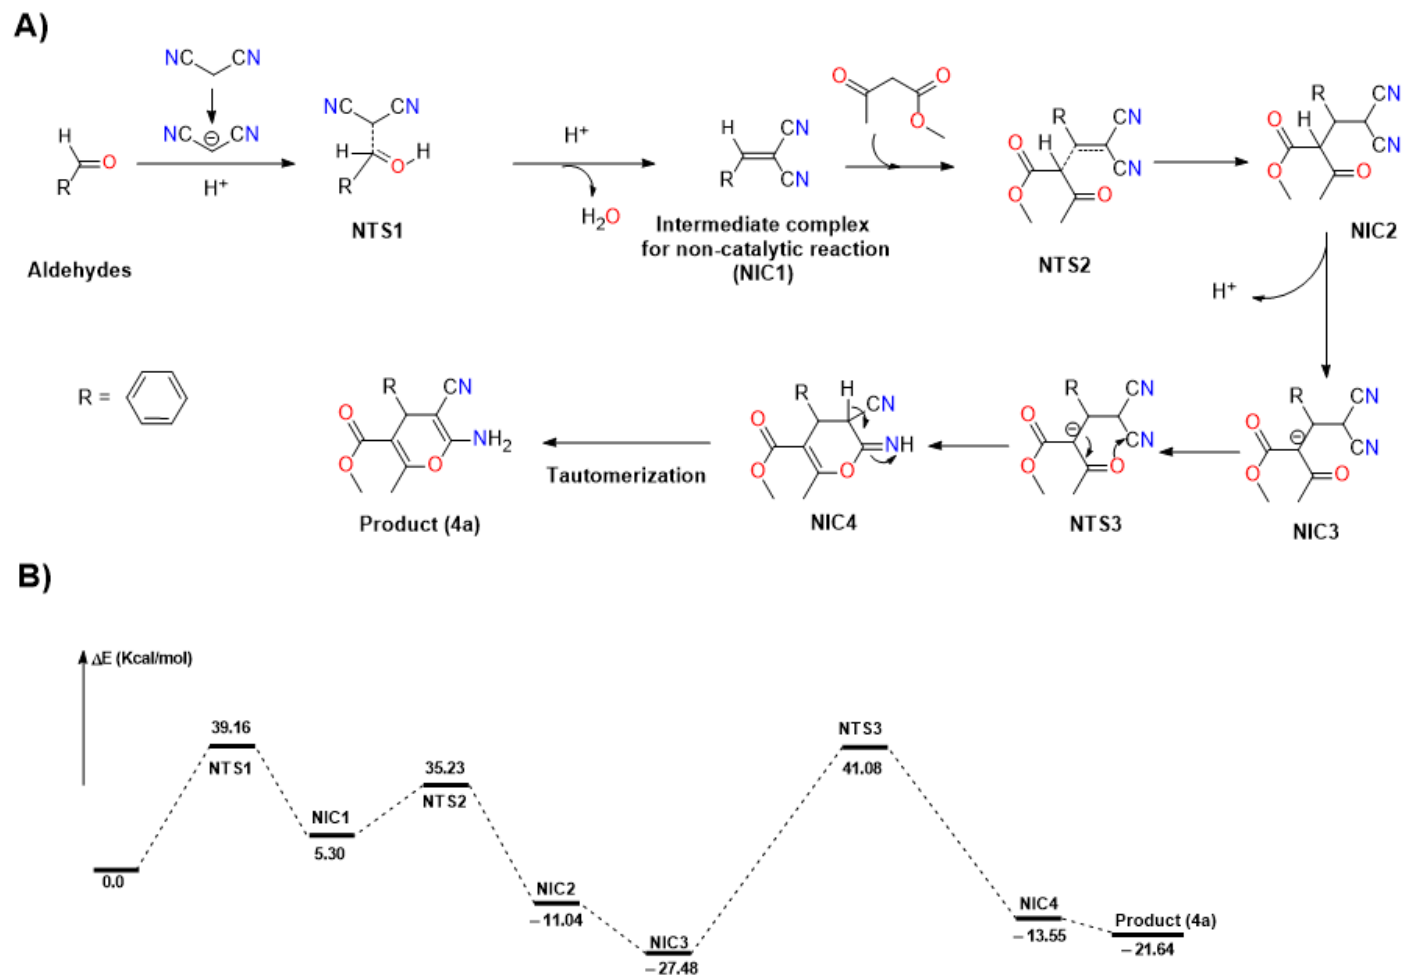

**Figure S12.** (A) Generally accepted mechanism and (B) DFT-computed energy profile for the non-catalytic reaction for the synthesis of 4a in water. All values are reported in kcal/mol.

## 7. Characterization of the recovered SA

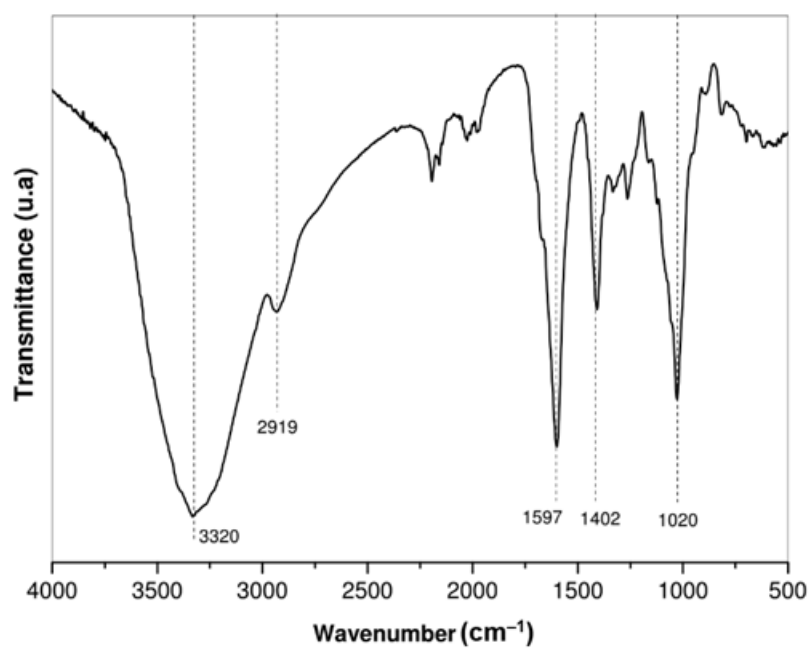

**Figure S13.** FTIR spectrum of the recovered SA after two cycles.
